# Supplementary material for: Non-random mating patterns within and across education and mental and somatic health
Source: Springer Nature journal article supplement (doi:10.1038/s41467-024-54966-9), 2024-12-03
Supplement: MOESM1 [file 41467_2024_54966_MOESM1_ESM.pdf]

## SUPPLEMENTARY INFORMATION

### Non-random mating patterns within and across education and mental and somatic health

FA Torvik, HF Sunde, R Cheesman, NH Eftedal, MC Keller, E Ystrom, EM Eilertsen

Corresponding author: Fartein Ask Torvik, [fartein.ask.torvik@fhi.no](mailto:fartein.ask.torvik@fhi.no)

#### Table of contents

##### Supplemental information for prospective analyses

|                                                    |    |
|----------------------------------------------------|----|
| Supplemental Figure S1. Within person correlations | S2 |
|----------------------------------------------------|----|

##### Supplemental information for prospective analyses with odds ratios

|                                                                                     |    |
|-------------------------------------------------------------------------------------|----|
| Supplemental Figure S2. Within person associations as odds ratios                   | S3 |
| Supplemental Figure S3. Within and across-trait partner associations as odds ratios | S4 |
| Supplemental Table S1. Results from logistic regression among partners and in-laws  | S5 |

##### Supplemental information for cross-sectional analyses

|                                                                                 |     |
|---------------------------------------------------------------------------------|-----|
| Supplemental Table S2. Prevalence rates                                         | S6  |
| Supplemental Table S3. Correlations between relatives                           | S7  |
| Supplemental Figure S4. Prevalence rates among affected and unaffected partners | S8  |
| Supplemental Figure S5. Correlations between partners with various adjustments  | S9  |
| Supplemental Figure S6. Within person correlations                              | S10 |
| Supplemental Figure S7. Partner correlations adjusted for age                   | S11 |
| Supplemental Figure S8. Partner correlations adjusted for age and GPA           | S12 |
| Supplemental Figure S9. Partner correlations adjusted for age and EA            | S13 |

##### Supplemental information for methods

|                                                                                         |     |
|-----------------------------------------------------------------------------------------|-----|
| Supplemental Script S1. Calculation of the in-law inflation factor (IIF)                | S14 |
| Supplemental Script S2. Potential bias in tetrachoric correlations for skewed variables | S15 |
| Supplemental Script S3. Potential bias in the product of tetrachoric correlations       | S16 |

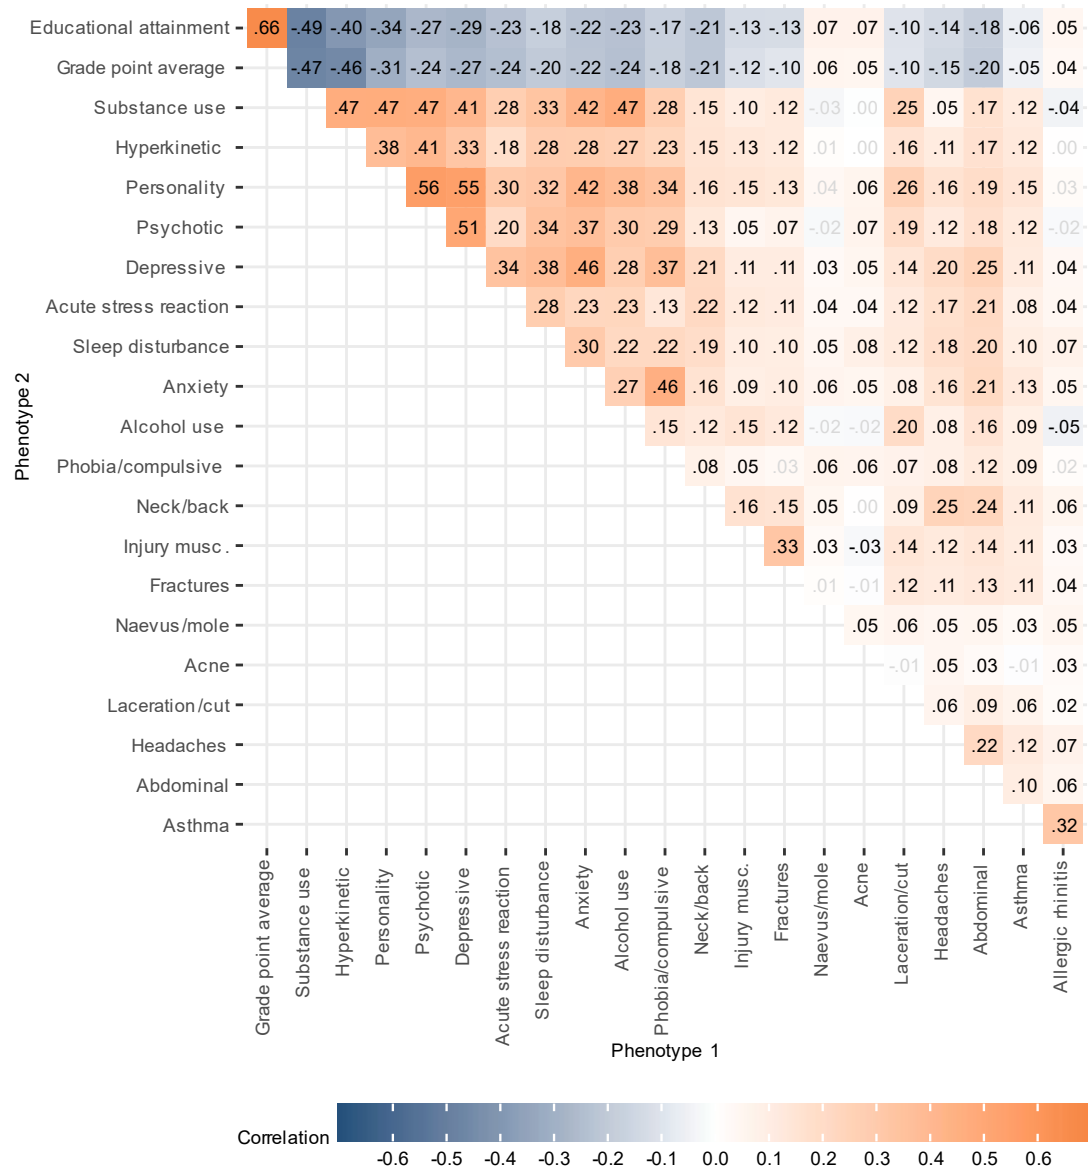

**Supplemental Figure S1. Prospective within person correlations.** Within person correlations for educational outcomes, 10 mental health conditions, and 10 somatic health conditions, 10 to 5 years before first child (n=187,926). Adjusted for age and sex. We tested whether the correlations differ from zero using two-sided z-tests based on the estimated correlations and their standard errors provided by OpenMx. Significant correlations ( $p < 0.05$  after Benjamini-Hochberg adjustment) are shown in black. Exact p-values are provided in the Source Data file.

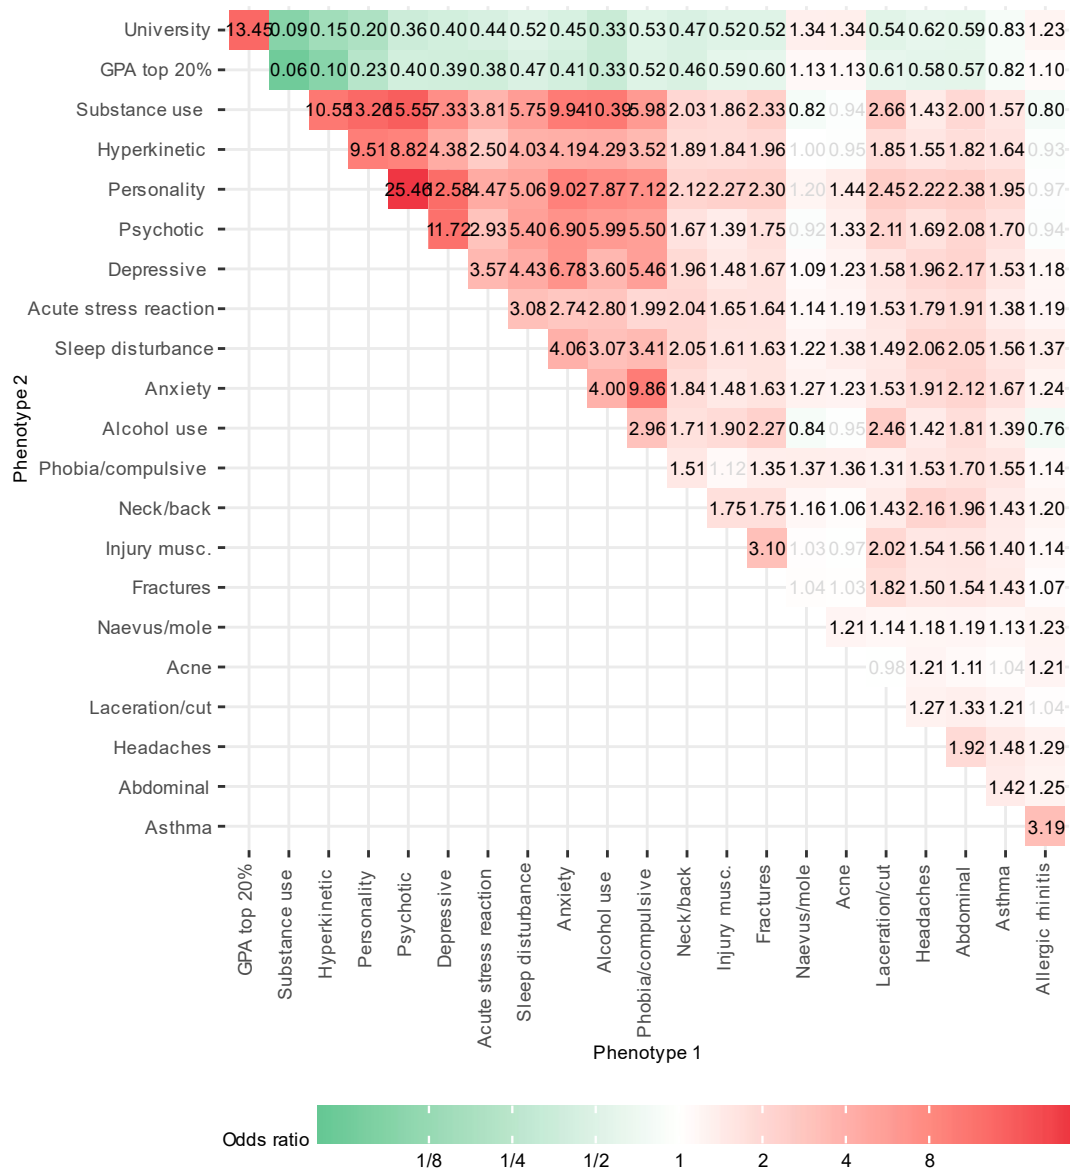

**Supplemental Figure S2. Prospective within person associations as odds ratios.** Odds ratios for within person associations between educational outcomes, 10 mental health conditions, and 10 somatic health conditions, 10 to 5 years before first child (n=187,926). Adjusted for age and sex. Odds ratios and their standard errors were estimated using the `glm` function in R. Significant associations (two-sided  $p < 0.05$  after Benjamini-Hochberg adjustment) are shown in black. Exact p-values are provided in the Source Data file.

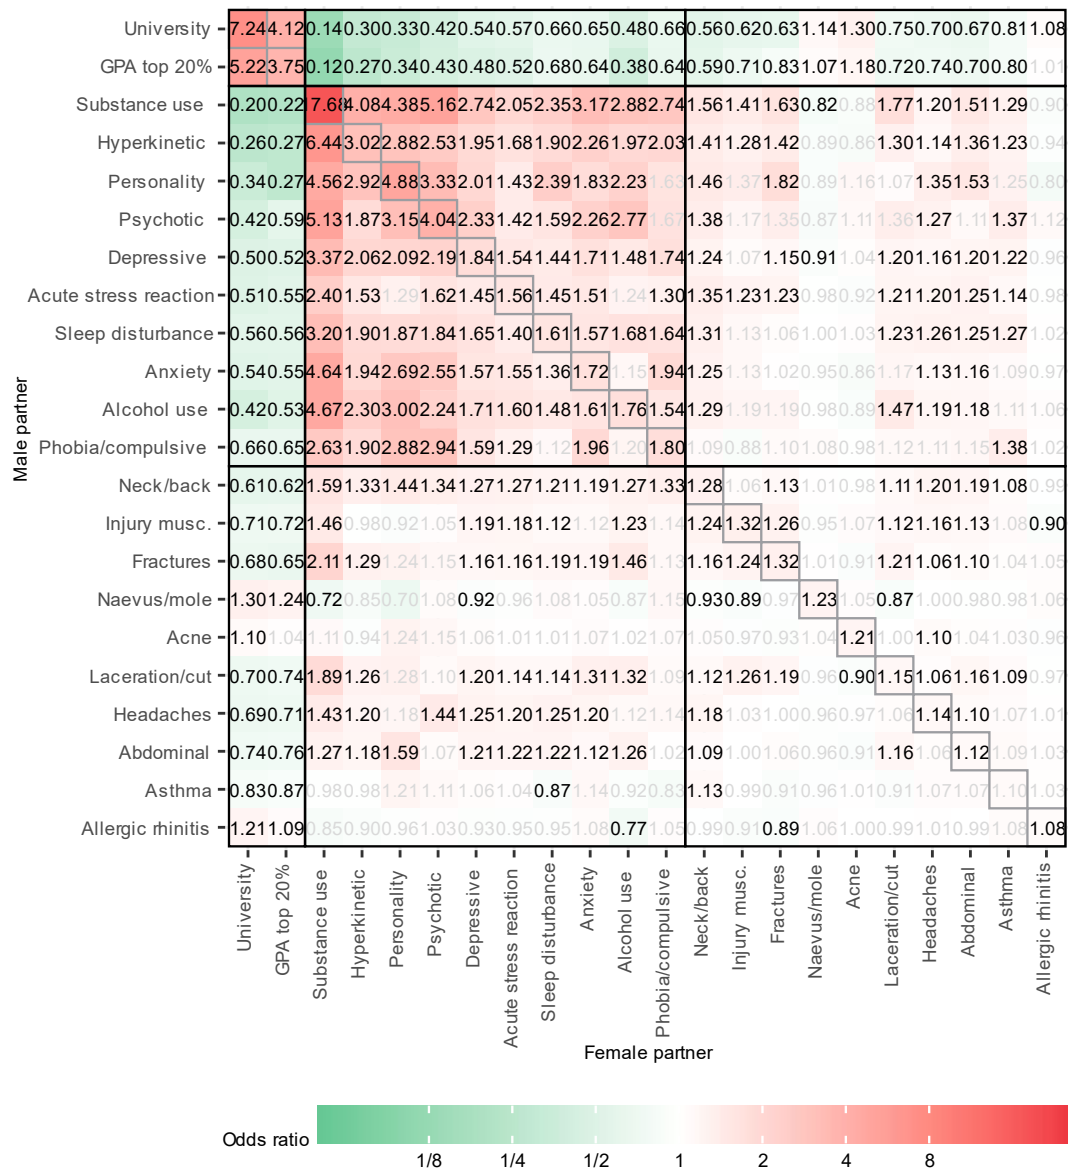

**Supplemental Figure S3. Prospective within and across-trait partner associations as odds ratios.**

Odds ratios for within and across-trait partner associations between educational outcomes, 10 mental health conditions, and 10 somatic health conditions, 10 to 5 years before first child, all adjusted for age (n=93,963 couples). Odds ratios and their standard errors were estimated using the `glm` function in R. Significant associations (two-sided  $p < 0.05$  after Benjamini-Hochberg adjustment) are shown in black. Exact p-values are provided in the Source Data file.

**Supplemental Table S1.** Results from multiple binary logistic regressions of each of the educational outcomes and the 10 mental and 10 somatic health conditions on the corresponding traits in partners, siblings, and in-laws. Health conditions were measured 10 to 5 years before a couple had their first child. Results expressed as adjusted odds ratios (OR), including 95% confidence intervals. Significant adjusted associations with siblings-in-law indicate deviations from direct assortment (n=93,963 couples; n=156,335 siblings; n=156,335 in-laws).

|                            | OR(partner)          | OR(sibling)       | OR(in-law)        |
|----------------------------|----------------------|-------------------|-------------------|
| University education       | 5.35 [5.11, 5.59]    | 3.58 [3.44, 3.73] | 1.76 [1.69, 1.83] |
| GPA among top 20%          | 2.76 [2.55, 3.00]    | 4.57 [4.22, 4.94] | 1.54 [1.42, 1.68] |
| Substance use disorders    | 16.07 [12.83, 20.12] | 4.91 [3.61, 6.68] | 3.74 [2.75, 5.08] |
| Hyperkinetic disorder      | 2.73 [2.17, 3.43]    | 6.40 [5.37, 7.62] | 1.37 [1.03, 1.81] |
| Personality disorder       | 1.99 [0.49, 8.06]    | 3.23 [1.19, 8.74] | 3.39 [1.25, 9.18] |
| Psychotic disorders        | 2.91 [1.53, 5.51]    | 3.41 [2.08, 5.59] | 0.96 [0.39, 2.32] |
| Depressive disorder        | 1.77 [1.62, 1.94]    | 2.36 [2.17, 2.56] | 1.27 [1.15, 1.39] |
| Acute stress reaction      | 1.46 [1.31, 1.63]    | 2.72 [2.48, 2.98] | 1.13 [1.01, 1.26] |
| Sleep disturbance          | 1.58 [1.38, 1.82]    | 1.89 [1.66, 2.15] | 1.05 [0.90, 1.24] |
| Anxiety disorder           | 1.59 [1.29, 1.96]    | 2.68 [2.28, 3.16] | 1.18 [0.94, 1.47] |
| Alcohol use disorders      | 1.69 [1.16, 2.46]    | 2.04 [1.39, 2.98] | 1.41 [0.91, 2.19] |
| Phobia/compulsive disorder | 1.73 [1.10, 2.71]    | 2.17 [1.49, 3.15] | 1.38 [0.85, 2.25] |
| Neck/back symptom          | 1.25 [1.19, 1.31]    | 1.49 [1.42, 1.57] | 1.14 [1.08, 1.20] |
| Injury musculoskeletal     | 1.29 [1.17, 1.41]    | 1.63 [1.49, 1.79] | 1.13 [1.03, 1.25] |
| Fractures                  | 1.27 [1.14, 1.42]    | 1.42 [1.27, 1.58] | 1.19 [1.06, 1.33] |
| Naevus/mole                | 1.18 [1.09, 1.27]    | 1.61 [1.50, 1.73] | 1.06 [0.98, 1.14] |
| Acne                       | 1.14 [1.00, 1.30]    | 2.33 [2.10, 2.59] | 0.96 [0.83, 1.11] |
| Laceration/cut             | 1.18 [1.08, 1.28]    | 1.21 [1.11, 1.32] | 1.04 [0.96, 1.14] |
| Headaches                  | 1.11 [1.03, 1.19]    | 1.49 [1.39, 1.59] | 1.05 [0.98, 1.12] |
| Abdominal pain             | 1.11 [1.04, 1.18]    | 1.41 [1.33, 1.50] | 1.06 [1.00, 1.13] |
| Asthma                     | 1.12 [0.99, 1.27]    | 2.50 [2.28, 2.75] | 1.04 [0.92, 1.18] |
| Allergic rhinitis          | 1.09 [1.00, 1.18]    | 2.03 [1.89, 2.18] | 1.02 [0.94, 1.12] |

**Supplemental Table S2.** List of ICPC-2 codes for the mental and somatic health condition, prevalence in the sample (including education), and prevalence among partners and relatives of affected individuals, measured cross sectionally in 2015-2019 (n=187,926 focal individuals; n=156,335 siblings; n=156,335 in-laws).

| Variable                      | ICPC-2 codes            | Index  |       | Partner of affected |       | Sibling of affected |       | In-law of affected |       |
|-------------------------------|-------------------------|--------|-------|---------------------|-------|---------------------|-------|--------------------|-------|
|                               |                         | n      | %     | n                   | %     | n                   | %     | n                  | %     |
| University education          |                         | 93,303 | 49.84 | 64,110              | 68.89 | 48,682              | 61.23 | 46,001             | 58.16 |
| GPA among top 20%             |                         | 26,824 | 20.15 | 8,058               | 37.43 | 7,654               | 42.38 | 5,085              | 32.38 |
| Substance use disorders       | P18, P19                | 2,899  | 1.54  | 724                 | 24.97 | 163                 | 8.22  | 143                | 6.76  |
| Hyperkinetic disorder         | P81                     | 5,216  | 2.78  | 618                 | 11.85 | 542                 | 14.03 | 223                | 5.60  |
| Personality disorder          | P80                     | 1,652  | 0.88  | 64                  | 3.87  | 53                  | 4.39  | 25                 | 1.99  |
| Psychotic disorders           | P72, P98, P73           | 1,965  | 1.05  | 80                  | 4.07  | 95                  | 6.26  | 29                 | 1.88  |
| Depressive disorder           | P76                     | 21,811 | 11.61 | 4,126               | 18.92 | 2,966               | 17.59 | 2,352              | 13.47 |
| Acute stress reaction         | P02                     | 24,996 | 13.30 | 5,442               | 21.77 | 3,320               | 16.81 | 2,564              | 12.67 |
| Sleep disturbance             | P06                     | 16,807 | 8.94  | 2,424               | 14.42 | 1,619               | 12.17 | 1,312              | 9.63  |
| Anxiety disorder              | P74                     | 8,202  | 4.36  | 648                 | 7.90  | 560                 | 8.83  | 353                | 5.34  |
| Alcohol use disorders         | P15, P16                | 2,505  | 1.33  | 158                 | 6.31  | 91                  | 4.83  | 64                 | 3.29  |
| Phobia/compulsive disorder    | P79                     | 3,702  | 1.97  | 146                 | 3.94  | 128                 | 4.44  | 93                 | 3.12  |
| Neck/back symptom/complaint   | L01, L02, L03           | 44,851 | 23.87 | 12,446              | 27.75 | 8,342               | 23.27 | 7,633              | 20.90 |
| Injury musculoskeletal        | L81                     | 12,271 | 6.53  | 1,094               | 8.92  | 911                 | 9.16  | 800                | 7.96  |
| Fractures                     | L72, L73, L74, L75, L76 | 10,641 | 5.66  | 764                 | 7.18  | 694                 | 8.01  | 556                | 6.40  |
| Naevus/mole                   | S82                     | 29,454 | 15.67 | 5,030               | 17.08 | 4,535               | 18.26 | 3,614              | 14.47 |
| Acne                          | S96                     | 7,721  | 4.11  | 326                 | 4.22  | 638                 | 10.00 | 356                | 5.53  |
| Laceration/cut                | S18                     | 15,377 | 8.18  | 1,388               | 9.03  | 1,299               | 10.15 | 1,152              | 9.11  |
| Headaches                     | N89, N90, N01, N95      | 32,011 | 17.03 | 5,148               | 16.08 | 4,808               | 18.59 | 4,136              | 15.64 |
| Abdominal pain/cramps general | D01                     | 36,242 | 19.29 | 6,878               | 18.98 | 5,427               | 18.73 | 4,809              | 16.17 |
| Asthma                        | R96                     | 11,415 | 6.07  | 800                 | 7.01  | 1,069               | 11.51 | 598                | 6.35  |
| Allergic rhinitis             | R97                     | 23,335 | 12.42 | 3,224               | 13.82 | 3,447               | 17.81 | 2,222              | 11.38 |

**Supplemental Table S3.** Correlations between relatives in educational outcomes and 10 mental and 10 somatic health conditions measured cross-sectionally in 2015-2019, including 95% confidence intervals, along with tests of deviations from direct assortment. Adjusted for sex and year of birth (n=93,963 couples; n=156,335 siblings; n=156,335 in-laws). Source data are provided in the source data file.

| Variable                   | <i>r</i> (partner) | <i>r</i> (sibling) | <i>r</i> (inlaw)    | Inlaw inflation factor (IIF)* | Deviation from direct assortment, p-value** |
|----------------------------|--------------------|--------------------|---------------------|-------------------------------|---------------------------------------------|
| Educational attainment     | 0.48 [0.47, 0.48]  | 0.40 [0.40, 0.40]  | 0.29 [0.28, 0.29]   | 1.50                          | <1.00e-99                                   |
| Grade point average        | 0.42 [0.42, 0.43]  | 0.52 [0.52, 0.53]  | 0.29 [0.29, 0.30]   | 1.33                          | <1.00e-99                                   |
| Substance use disorders    | 0.67 [0.65, 0.70]  | 0.32 [0.29, 0.36]  | 0.27 [0.24, 0.31]   | 1.25                          | 0.006                                       |
| Hyperkinetic disorder      | 0.33 [0.30, 0.36]  | 0.38 [0.36, 0.40]  | 0.13 [0.10, 0.16]   | 1.03                          | 0.805                                       |
| Personality disorder       | 0.24 [0.17, 0.30]  | 0.24 [0.19, 0.29]  | 0.10 [0.05, 0.16]   | 1.83                          | 0.234                                       |
| Psychotic disorders        | 0.25 [0.19, 0.31]  | 0.23 [0.19, 0.27]  | 0.02 [-0.04, 0.07]  | 0.31                          | 0.236                                       |
| Depressive disorder        | 0.25 [0.23, 0.27]  | 0.17 [0.16, 0.19]  | 0.07 [0.05, 0.08]   | 1.57                          | 0.002                                       |
| Acute stress reaction      | 0.25 [0.23, 0.26]  | 0.19 [0.18, 0.20]  | 0.06 [0.05, 0.08]   | 1.36                          | 0.023                                       |
| Sleep disturbance          | 0.17 [0.15, 0.19]  | 0.13 [0.11, 0.14]  | 0.05 [0.03, 0.06]   | 2.26                          | 0.003                                       |
| Anxiety disorder           | 0.17 [0.14, 0.20]  | 0.18 [0.16, 0.20]  | 0.05 [0.02, 0.07]   | 1.53                          | 0.280                                       |
| Alcohol use disorders      | 0.28 [0.23, 0.33]  | 0.20 [0.15, 0.24]  | 0.11 [0.07, 0.16]   | 2.09                          | 0.023                                       |
| Phobia/compulsive disorder | 0.14 [0.09, 0.18]  | 0.13 [0.10, 0.17]  | 0.07 [0.03, 0.11]   | 3.68                          | 0.026                                       |
| Neck/back symptom          | 0.12 [0.11, 0.13]  | 0.11 [0.10, 0.12]  | 0.05 [0.04, 0.06]   | 3.35                          | 4.50e-09                                    |
| Injury musculoskeletal     | 0.09 [0.07, 0.12]  | 0.08 [0.07, 0.10]  | 0.04 [0.02, 0.06]   | 4.71                          | 0.006                                       |
| Fractures                  | 0.07 [0.04, 0.10]  | 0.08 [0.06, 0.10]  | 0.02 [-0.00, 0.04]  | 2.70                          | 0.387                                       |
| Naevus/mole                | 0.07 [0.06, 0.09]  | 0.13 [0.11, 0.14]  | 0.01 [0.00, 0.03]   | 1.58                          | 0.403                                       |
| Acne                       | 0.04 [0.01, 0.08]  | 0.16 [0.14, 0.19]  | 0.02 [-0.01, 0.05]  | 2.95                          | 0.355                                       |
| Laceration/cut             | 0.06 [0.04, 0.08]  | 0.08 [0.06, 0.09]  | 0.04 [0.02, 0.05]   | 7.79                          | 0.001                                       |
| Headaches                  | 0.06 [0.04, 0.07]  | 0.11 [0.10, 0.12]  | 0.03 [0.01, 0.04]   | 3.95                          | 0.006                                       |
| Abdominal pain             | 0.09 [0.07, 0.10]  | 0.09 [0.08, 0.10]  | 0.02 [0.01, 0.03]   | 2.97                          | 0.021                                       |
| Asthma                     | 0.04 [0.01, 0.06]  | 0.19 [0.18, 0.21]  | 0.02 [-0.00, 0.04]  | 2.67                          | 0.301                                       |
| Allergic rhinitis          | 0.04 [0.02, 0.06]  | 0.18 [0.17, 0.19]  | -0.00 [-0.01, 0.01] | -0.07                         | 0.330                                       |

Notes: \* IIF is expected to equal 1.00 under direct assortment. The cross-sectional partner correlations can be influenced by convergence, generally reducing the IIF. This may cancel out effects of indirect assortment and social stratification, which generally increases IIF, thereby limiting the interpretability of IIF among established couples. \*\* The p-values result from likelihood-ratio tests (1 degree of freedom) comparing a constrained model, where the in-law correlation is the product of partner and sibling correlations, to an unconstrained model with independent estimates for each relationship type. The p-values are adjusted for false discovery rate using the Benjamini-Hochberg method. A low p-value signifies a poor fit for direct assortment.

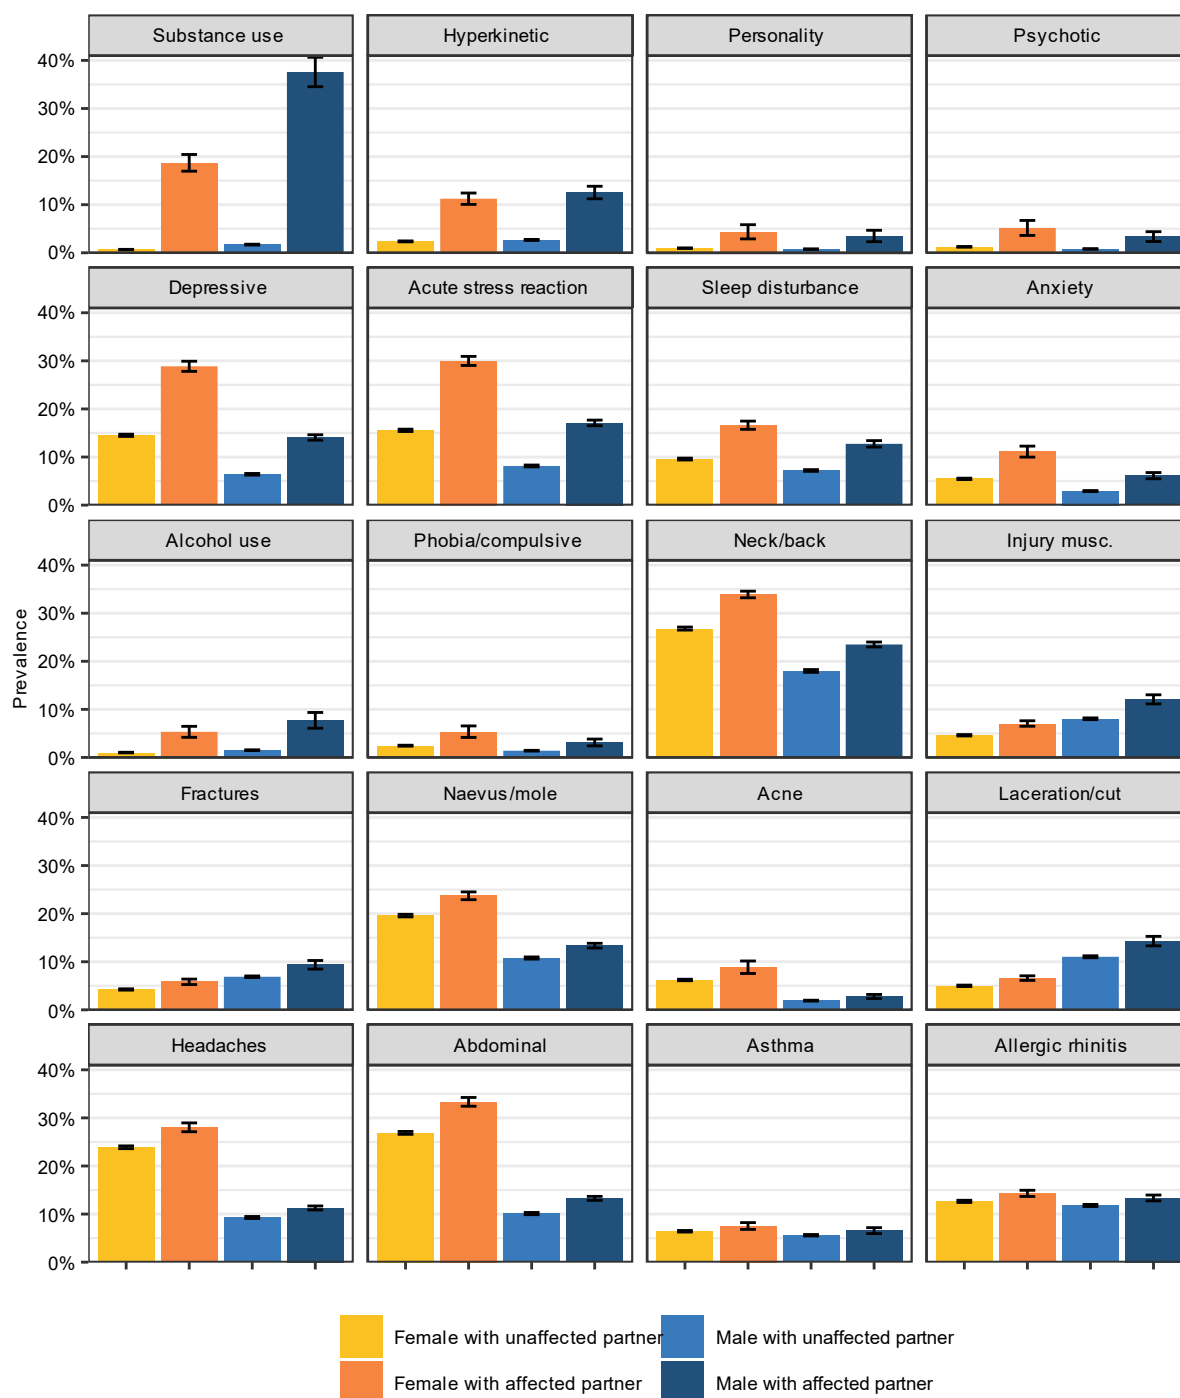

**Supplemental Figure S4. Prevalence rates among affected and unaffected partners.** Prevalence of 10 mental and 10 somatic health conditions among males (n=93,963) and females (n=93,963) with unaffected and affected partners, measured cross sectionally in 2015-2019. Data are presented as the proportions of diagnosed individuals, with error bars indicating 95% confidence intervals. Source data are provided in the source data file.



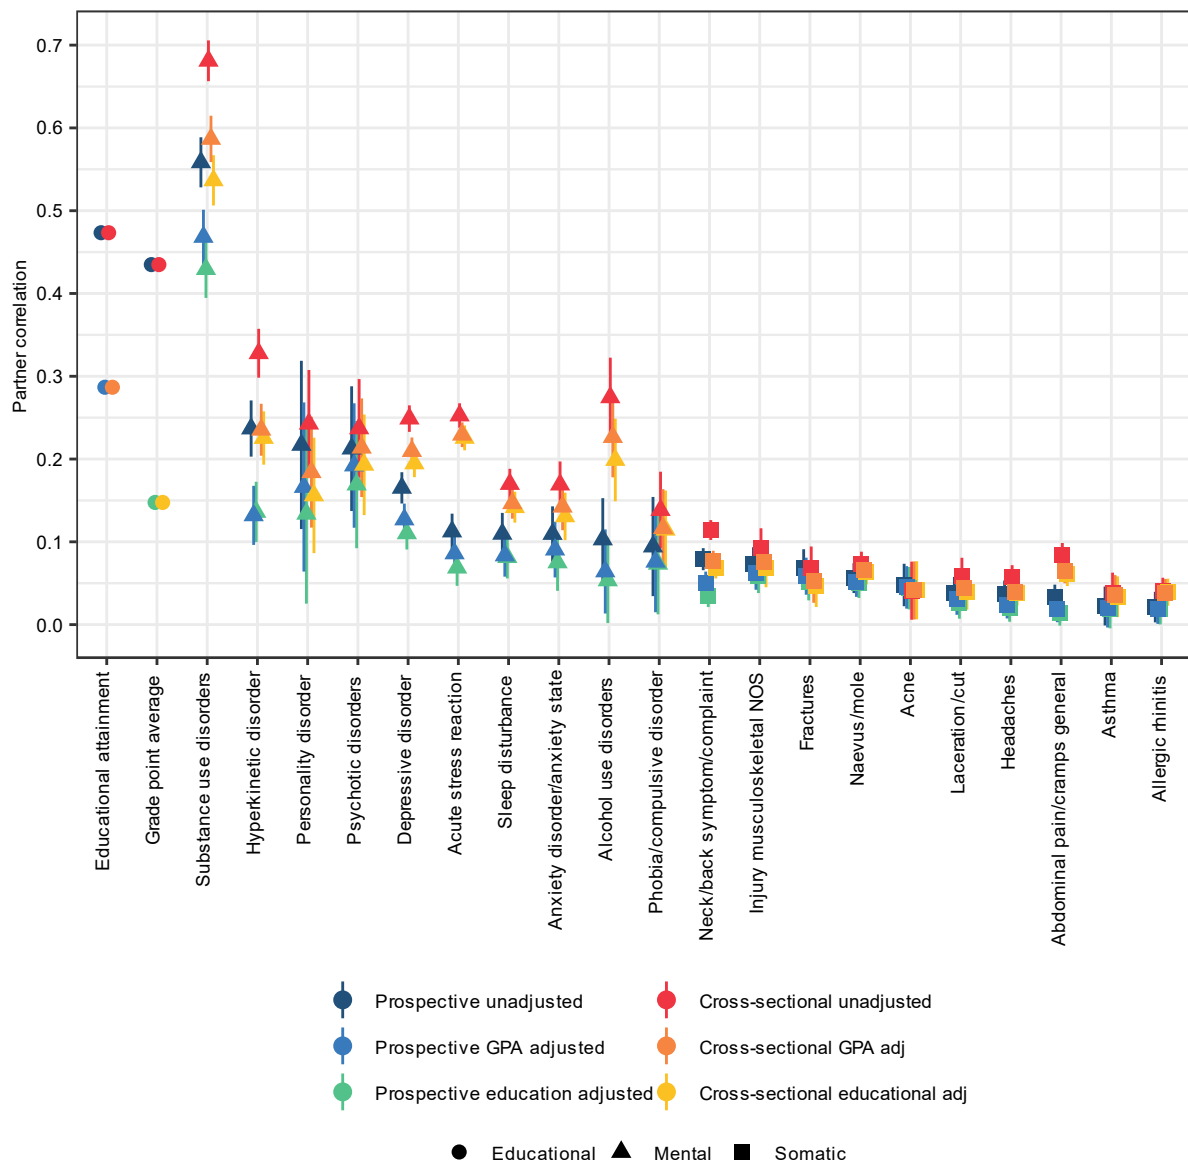

**Supplemental Figure S5. Correlations between partners with various adjustments.** Correlations between female and male partners for educational outcomes and 10 mental health and 10 somatic health phenotypes 10 to 5 years before they had their first child and cross-sectionally in 2015-2019 (n=93,963 couples). Including adjustment for educational attainment and grade point average in both assessments. Source data are provided in the source data file.

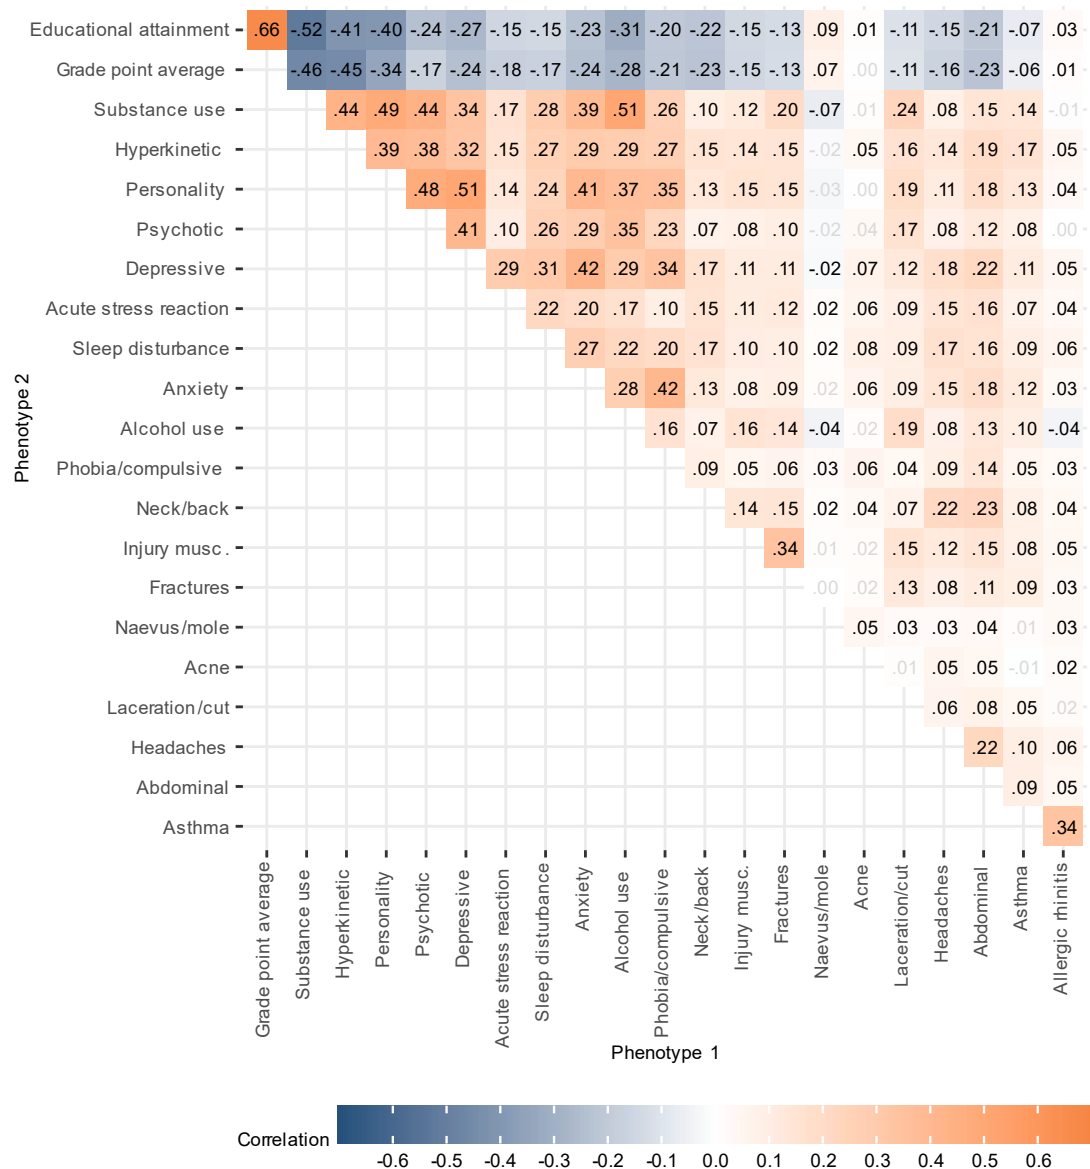

**Supplemental Figure S6. Cross-sectional within person correlations.** Within person correlations for educational outcomes, 10 mental health conditions, and 10 somatic health conditions, measured cross sectionally in 2015-2019 (n=187,926). Adjusted for age and sex. We tested whether the correlations differ from zero using two-sided z-tests based on the estimated correlations and their standard errors provided by OpenMx. Significant correlations ( $p < 0.05$  after Benjamini-Hochberg adjustment) are shown in black. Exact p-values are provided in the Source Data file.

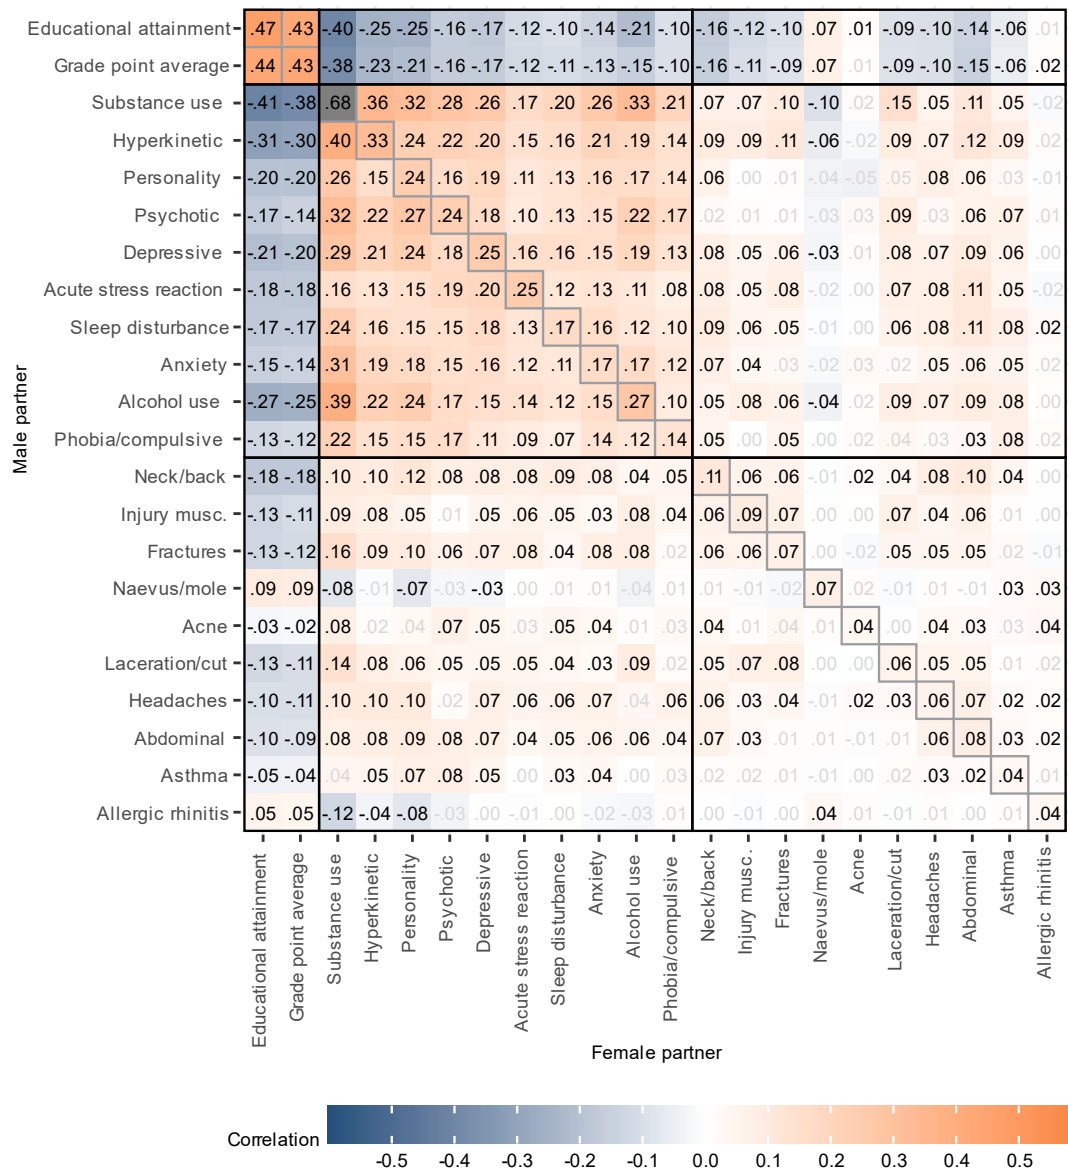

**Supplemental Figure S7. Cross-sectional partner correlations.** Within and across-trait partner correlations for educational outcomes, 10 mental health conditions, and 10 somatic health conditions, measured cross sectionally in 2015-2019 (n=93,963 couples). Adjusted for age. We tested whether the correlations differ from zero using two-sided z-tests based on the estimated correlations and their standard errors provided by OpenMx. Significant correlations ( $p < 0.05$  after Benjamini-Hochberg adjustment) are shown in black. Exact p-values are provided in the Source Data file.

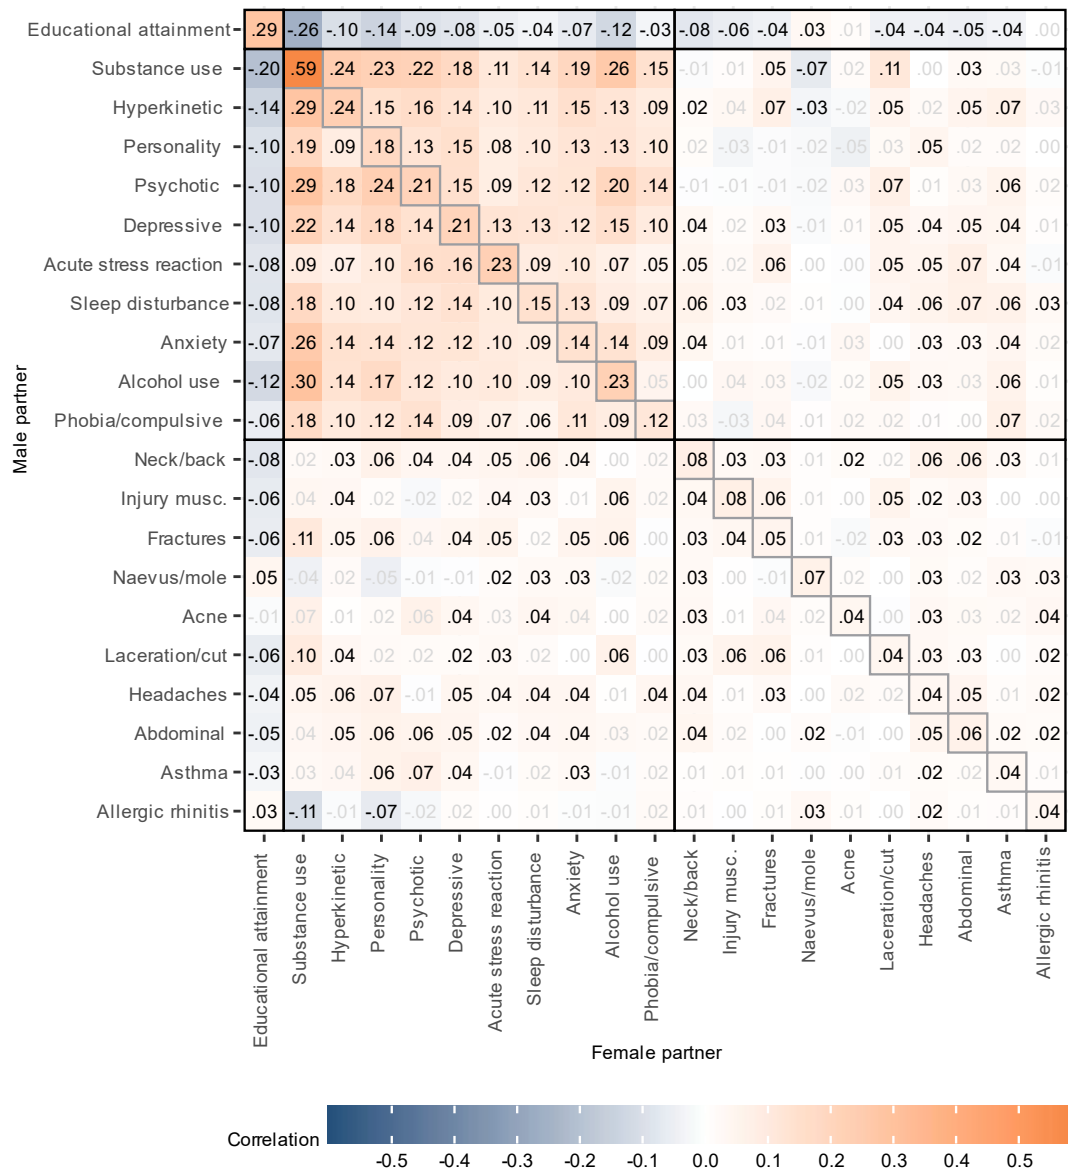

**Supplemental Figure S8. Cross-sectional partner correlations adjusted for grade point average.**

Within and across-trait partner correlations for 10 mental health conditions, and 10 somatic health conditions, measured cross sectionally in 2015-2019 (n=93,963 couples). Adjusted for age and grade point average attainment. We tested whether the correlations differ from zero using two-sided z-tests based on the estimated correlations and their standard errors provided by OpenMx. Significant correlations ( $p < 0.05$  after Benjamini-Hochberg adjustment) are shown in black. Exact p-values are provided in the Source Data file.

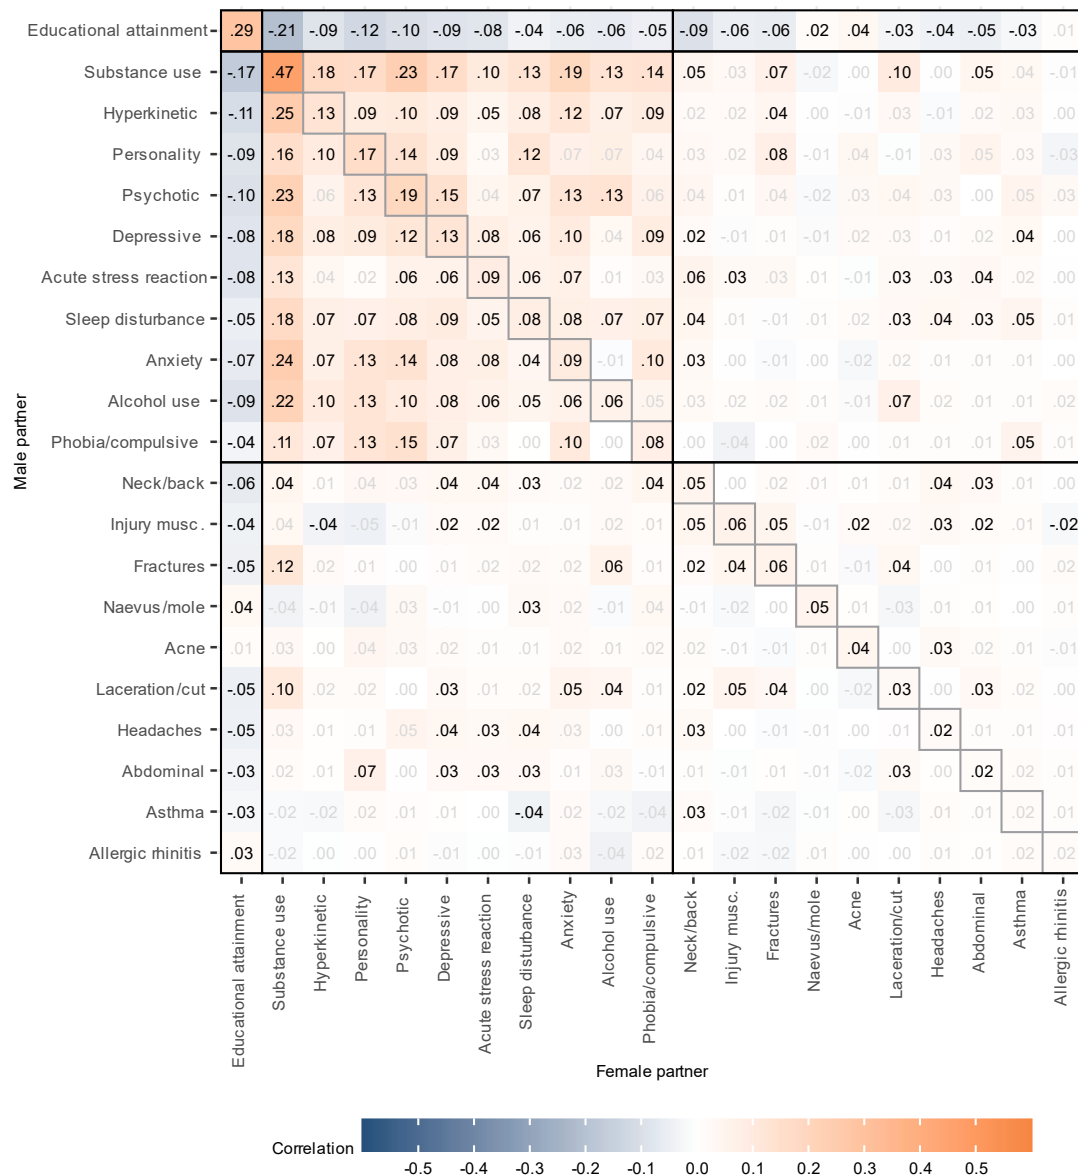

**Supplemental Figure S9. Cross-sectional partner correlations adjusted for educational attainment.** Within and across-trait partner correlations for 10 mental health conditions, and 10 somatic health conditions, measured cross sectionally in 2015-2019 (n=93,963 couples). Adjusted for age and educational attainment. We tested whether the correlations differ from zero using two-sided z-tests based on the estimated correlations and their standard errors provided by OpenMx. Significant correlations ( $p < 0.05$  after Benjamini-Hochberg adjustment) are shown in black. Exact p-values are provided in the Source Data file.

```

library(tidyverse)
N = 10000
IIF = function(m,a,r,x,n,q,e) {
  rpartner = m*a*a+m*x*x+2*x*a+n*n+q*q
  rsibling = a*a*r+e+q*q
  rinlaw = (a*m+x)*r*a+q*q
  rinlaw/(rpartner*rsibling)
}

d = tibble(
  m = runif(N),
  a = runif(N),
  r = runif(N),
  x = 0,
  n = 0,
  q = 0,
  re = runif(N),
  e = re*(1-a^2),
  iif = IIF(m,a,r,x,n,q,e)
)
d %>% filter(iif < 1) %>% count(re > r)

```

**Supplemental Script S1.** R script illustrating of how to simulate the in-law inflation factor (IIF) under various forms of assortment. The current scenario demonstrates indirect assortment and that IIF is above 1.00 except in the implausible cases where  $r_e < r_s$ .

```

library(polycor)

# dichotomized normally distributed variables
n = 10000
vc = rnorm(n)
va = vc+rnorm(n)
vb = vc+rnorm(n)

va_dich = ifelse(va<2,0,1)
vb_dich = ifelse(vb<2,0,1)

# pearson correlation between original variables
cor(va,vb)

# pearson correlation between dichotomized variables (underestimated)
cor(va_dich, vb_dich)

# polychoric correlation between dichotomized variables (correct)
polychor(va_dich,vb_dich)

# dichotomized skewed variables
n = 100000
vc = rnorm(n)
va = (vc+rnorm(n))^2
vb = (vc+rnorm(n))^2

hist(va)

va_dich = ifelse(va<5,0,1)
vb_dich = ifelse(vb<5,0,1)

# pearson correlation between original variables
cor(va,vb)

# pearson correlation between dichotomized variables
cor(va_dich, vb_dich)

# polychoric correlation between dichotomized variables (overestimated)
polychor(va_dich,vb_dich)

```

**Supplemental Script S2.** R script estimating tetrachoric correlations for variables with underlying normal or skewed distributions. Tetrachoric correlations get overestimated when based on non-normal variables. Written for R.

```

library(tidyverse)
library(polycor)

(randvar=runif(1))

# normally distributed variables

n = 100000
common1 = rnorm(n)
person_i = common1 + rnorm(n)*randvar      # index
person_ip = common1 + rnorm(n)*randvar     # index' partner
person_ips = person_ip/2 + rnorm(n)*randvar # index' partner's sibling
(inlaw)

# correlation matrix
cor(tibble(person_i, person_ip, person_ips))

# observed correlations between indirectly associated variables (e.g.
between in-laws)
cor(person_i, person_ips)

# observed product of correlations (matches the expectation)
cor(person_i, person_ip)*cor(person_ip, person_ips)

# skewed variables
person_i2 = person_i^2
person_ip2 = person_ip^2
person_ips2 = person_ips^2

# correlation matrix
cor(tibble(person_i2, person_ip2, person_ips2))

# observed correlations between indirectly associated variables (e.g.
between in-laws)
cor(person_i2, person_ips2)

# observed product of correlations (still matches the expectation)
cor(person_i2, person_ip2)*cor(person_ip2, person_ips2)

# dichotomized skewed variables
threshold=3
person_i2_dich = ifelse(person_i2<threshold,0,1)
person_ip2_dich = ifelse(person_ip2<threshold,0,1)
person_ips2_dich = ifelse(person_ips2<threshold,0,1)

# correlation matrix
cor(tibble(person_i2_dich, person_ip2_dich, person_ips2_dich))

# observed pearson correlations between indirectly associated variables
(e.g. between in-laws)
cor(person_i2_dich, person_ips2_dich)

# observed product of pearson correlations (lower than the expectation)
cor(person_i2_dich, person_ip2_dich)*cor(person_ip2_dich, person_ips2_dich)

# observed polychoric correlations between indirectly associated variables
(e.g. between in-laws)
polychor(person_i2_dich, person_ips2_dich)

# observed product of polychoric correlations (matches the expectation
again)
polychor(person_i2_dich, person_ip2_dich)*polychor(person_ip2_dich,
person_ips2_dich)

```

**Supplemental Script S3.** R script estimating the product of tetrachoric correlations for skewed variables. This script shows that if the product of two Pearson correlations matches with a third correlation, this is also the case for tetrachoric correlations after dichotomization, even if the underlying variables are skewed. Written for R.
